# Supplementary material for: Sorting out the Superbugs: Potential of Sortase A Inhibitors among Other Antimicrobial Strategies to Tackle the Problem of Antibiotic Resistance
Source: Antibiotics (Basel). 2021 Feb 5;10(2):164. doi: 10.3390/antibiotics10020164 (PMC7916047; doi:10.3390/antibiotics10020164)
Supplement: Supplementary file 1 [file antibiotics-10-00164-s001.xlsx]

## Sheet: SupplementaryTable1
Derived from	Source		Compound	Title of the compound from the original study	MW (g/mol)	IC50 (μM)	IC50 (μg/mL)	Substrate	SrtA for IC50 determination	Type (reversible/irreversible)	in vivo studies carried out	MIC (μg/mL)	MIC (μM)	Strain for MIC determination	Reference
Natural products	Bulbs of Fritillaria verticillata Willdenow var. thunbergii		β-Sitosterol-3-O-glucopyranoside	-	576.439	31.75*	18.3	Dabcyl-QALPETGEE-Edans	SrtAΔN from S. aureus ATCC 6538p	Not clearly indicated	No	200	346.96*	S. aureus ATCC 6538p**	(Kim et al., 2003)
	Coptis chinensis Franch rhizome		Berberine chloride	-	371.092	23.44*	8.7	Dabcyl-QALPETGEE-Edans	SrtAΔN from S. aureus ATCC 6538p	Not clearly indicated	No	100	269.48*	S. aureus ATCC 6538p**	(Kim et al., 2004)
	Sponge Spongosorites sp.		Deoxytopsentin	Compound 1	326.117	48.05 ± 1.66*	15.67 ± 0.54	Dabcyl-QALPETGEE-Edans	SrtAΔN24 from S. aureus ATCC 6538p	Not clearly indicated	No	6.25	19.16*	S. aureus strain Newman	(Oh et al., 2005)
	Sponge Aaptos aaptos		Isoaaptamine	Compound 2	228.09	16.22 ± 0.88*	3.70 ± 0.20	Dabcyl-QALPETGEE-Edans	SrtAΔN24 from S. aureus ATCC 6538p	Not clearly indicated	No	50	219.21*	S. aureus strain Newman	(Jang et al., 2007)
	Roots of Sophora flavescens		Kurarinol	Compound 6	456.215	107.00 ± 6.60	48.81 ± 3.01 *	Dabcyl-QALPETGEE-Edans	SrtAΔN from S. aureus ATCC 6538p	Not clearly indicated	No	99.91*	219	S. aureus ATCC 6538p**	(Oh et al., 2011)
	Curcuma longa L. Rhizome		Curcumin	Compound 1	368.126	37.49 ± 1.90 *	13.80 ± 0.70	Dabcyl-QALPETGEE-Edans	SrtAΔN from S. aureus ATCC 6538p	Not clearly indicated	No	>200.00	>543.30*	S. aureus strain Newman	(Park et al., 2005)
	Flowers of Sophora japonica		Maltol-3-O-(4'-O-cis-p-coumaroyl-6'-O-(3-hydroxy-3-methylglutaroyl))-β-glucopyranoside -O- (3-hydroxy-3-methylglutaroyl))-b-glucopyranoside	Compound 2	578.52	58.60 ± 1.60	33.90 ± 0.90	Dabcyl-QALPETGEE-Edans	recombinant SrtA from Streptococcus mutans OMZ65	Not clearly indicated	No	200	>345.90	S. mutans OMZ65	(Yang et al., 2015)
	Roots of Pulsatilla koreana		(-)-rosmarinic acid	Compound 7	360.085	20.1	7.24*	Dabcyl-QALPETGEE-Edans	SrtA∆40 Streptococcus mutans OMZ65	Not clearly indicated	No	Not tested	Not tested	Not tested	(Lee et al., 2014)
	Bark of Rhus verniciflua		Morin	-	302.043	37.39 ± 3.14	11.30 ± 0.95*	Dabcyl-QALPETGEE-Edans	SrtA∆24 from S. aureus ATCC 6538p	Not clearly indicated	No	>90.61*	>300.00	S. aureus strain Newman	(Kang et al., 2006)
	Sponge Sceptrella sp.		(-)-discorhabdin Z	Compound 12	356.125	6.5	2.31*	Not indicated	Not specified	Not clearly indicated	No	>100.00	>280.8*	S. aureus ATCC 65389**	(Jeon et al., 2010)
	Sponge Coscinoderma sp.		Halisulfate 1	Compound 3	570.299	36	20.53*	Dabcyl-QALPETGEE-Edans	SrtA∆N from S. aureus ATCC 6538p	Not clearly indicated	No	1.56-25.00 (not specified for individual compounds)	2.74-43.84*	Not specified (B. subtilis, M. luteus, S. aureus, P. vulgaris, S. typhimurium)**	(Bae et al., 2011)
	Ascidian Synoicum sp.		Cadiolide E	Compound 1	793.643	78.8	62.54*	Dabcyl-QALPETGEE-Edans	SrtA∆N from S. aureus ATCC 6538p	Not clearly indicated	No	3.1	3.91*	S. aureus ATCC 6538p**	(Won et al., 2012a)
	Ascidian Synoicum sp.		Eudistomin Y5	Compound 4	445.909	146.40 ± 1.90	65.28 ± 0.85*	Dabcyl-QALPETGEE-Edans	SrtAΔN from S. aureus ATCC 6538p	Not clearly indicated	No	6.25	14.02*	S. aureus ATCC 6538p**	(Won et al., 2012b)
	Flos Lonicerae		Chlorogenic acid	CGA	354.095	95.62 ± 15.67*	33.86 ± 5.55	Dabcyl-QALPETGEE-Edans	SrtAΔN59 from S. aureus Newman D2C	Reversible? ("hydrogen bonding and hydrophobic interactions")	Yes (Wang, 2015)	>1024.00	>2891.88*	S. aureus ATCC25904**	(Wang et al., 2015)
	Sponge Hyrtios sp.		6-hydroxydihydro-β-carboline	Compound 1	232.24	290	67	Dabcyl-QALPETGEE-Edans	SrtAΔN from S. aureus ATCC 6538p	Not clearly indicated	No	Not tested for this compound	Not tested for this compound	Not tested for this compound**	(Lee et al., 2010)
	Rhizoma Smilacis Glabrae		Astilbin	-	450.116	16.66*	7.5	Abz-LPATG-Dap(Dnp)-NH2	recombinant SrtA from Streptococcus mutans	Reversible? ("electrostatic, hydrogen bond, and Van der Waals interactions")	No	>1024.00	>2274.97*	S. mutans ATCC 25175	(Wang et al., 2019)
	Traditional Chinese Medicines such as Fagopyrum esculentum, Ruta graveolens, and Sophora japonica		Rutin	-	610.153	53.84 ± 3.90	32.85 ± 2.38*	Dabcyl-QALPETGEE-Edans	srtAΔ82 from Streptococcus agalactiae NCTC8187	Not clearly indicated	Yes (Dong et al., 2021)	>256.00	>419.57*	S. agalactiae PBSA0903	(Dong et al., 2021)
Small molecule screen	Diverse small molecular library of 1000 compounds	hit	Methyl (2E)-2,3-bis(4-methoxyphenyl)acrylate	Compound 1	298.333	231.09 ± 6.53	68.94 ± 1.95*	Dabcyl-QALPETGEE-Edans	SrtAΔN from S. aureus ATCC 6538p	Not clearly indicated	No	Not tested	Not tested	Not tested	(Oh et al., 2004)
		further synthesis	(Z)-2,3-bis(4-methoxyphenyl)acrylonitrile	Compound 10	265.11	27.89 ± 0.49	7.39 ± 0.13*	Dabcyl-QALPETGEE-Edans	SrtAΔN from S. aureus ATCC 6538p	Not clearly indicated	No
		further synthesis	(Z)-3-(2,5-Dimethoxyphenyl)-2-(4-methoxyphenyl)acrylonitrile (DMMA)	Compound 14c	295.332	9.24 ± 0.47	2.73 ± 0.14*	Dabcyl-QALPETGEE-Edans	SrtAΔN from S. aureus ATCC 6538p	Reversible	Yes (Oh et al., 2010)	>200.00	>677.21*	S. aureus strain Newman	(Oh et al., 2004, 2006)
	Library of 136,625 compounds		3-(dimethylamino)-1-(2-thienyl)-1-propanone	Compound AAEK1	183.072	47	8.60*	Abz-LPETG-Dap(Dnp)-NH2	S. aureus SrtAΔN**	Irreversible	No	Not tested	Not tested	Not tested	(Maresso et al., 2007)
			1-(3,4-dichlorophenyl)-3-(dimethylamino)-1-propanone	Compound AAEK2	245.037	15	3.68*	Abz-LPETG-Dap(Dnp)-NH2	S. aureus SrtAΔN**	Irreversible	No
	Library of ~30,000 compounds	lead 1	((5Z)-5-(3-Bromo-2-hydroxy-5-nitrobenzylidene)-3-(2,4-dimethylphenyl)-2-thioxo-1,3-thiazolidin-4-one)	Compound 1	463.95	3.70 ± 0.10	1.72 ± 0.05*	Abz-LPETG-Dap(Dnp)-NH2	S. aureus SrtAΔN59	Reversible	No	~4.64*	~10.00	S. aureus	(Suree et al., 2009)
		lead 2	2-(3-Chlorophenyl)-4-methoxy-5-sulfanyl-3(2H)-pyridazinone	Compound 2	268.72	4.50 ± 0.30	1.21 ± 0.08*	Abz-LPETG-Dap(Dnp)-NH2	S. aureus SrtAΔN59	Reversible	No	>268.72*	>1000.00	S. aureus
		further synthesis	4-(Ethylthio)-5-mercapto-2-phenyl-3(2H)-pyridazinone	Compound 2-9	264.039	1.4 ± 0.7	0.37 ± 0.18*	Abz-LPETG-Dap(Dnp)-NH2	S. aureus SrtAΔN59**	Not clearly indicated	No	Not tested	Not tested	Not tested
		lead 3	((4E)-5-Methyl-4-[(4-nitroanilino)methylidene]-2-phenylpyrazole-3-thione)	Compound 3	338.08	5.20 ± 0.10	1.76 ± 0.03*	Abz-LPETG-Dap(Dnp)-NH2	S. aureus SrtAΔN59	Reversible	No	>338.08*	>1000.00	S. aureus
		further synthesis	((4E)-5-Methyl-2-phenyl-4-[(2,4,6-tribromoanilino)methylidene]pyrazole-3-thione)	compound 3-12	528.828	0.30 ± 0.04	0.16 ± 0.02*	Abz-LPETG-Dap(Dnp)-NH2	S. aureus SrtAΔN59**	Not clearly indicated	No	Not tested	Not tested	Not tested
	Library comprising 50,240 drug-like compounds	best hit	N-(adamantan-1-yl)-2-(3-oxo-2,3-dihydro-1,2-benzothiazol-2-yl)-acetamide	Compound 1a	342.14	6.11 ± 0.34	2.09 ± 0.12*	Dabcyl-QALPETGEE-Edans	S. aureus SrtAΔN59-6His	Irreversible	No	1	2.92	S. aureus**	(Zhulenkovs et al., 2014)
		further synthesis	N′-(2-(3-oxobenzo[d]isothiazol-2(3H)-yl)acetyl)adamantane-1-carbohydrazide	Compound 1n	408.136	3.80 ± 0.10	1.55 ± 0.04*	Dabcyl-QALPETGEE-Edans	S. aureus SrtAΔN59-6His	Irreversible	No	16	41.51	S. aureus**
		further synthesis	N′-(3-(3-oxobenzo[d]isothiazol-2(3H)-yl)propanoyl)adamantane-1-carbohydrazide	Compound 1o	400.169	4.22 ± 0.12	1.69 ± 0.05*	Dabcyl-QALPETGEE-Edans	S. aureus SrtAΔN59-6His	Irreversible	No	8	20.02	S. aureus**
	High-throughput screening of ∼28500 compounds	synthetic modification of hit compounds	N-(5-((4-Nitrobenzyl)thio)-1,3,4-thiadiazol-2-yl)nicotinamide	Compound 6g	374.038	3.80 ± 0.30	1.42 ± 0.11*	Abz-LPETGK-(Dnp)–NH2	recombinant SrtA	Irreversible	No	Not tested for this compound	Not tested for this compound	Not tested for this compound**	(Wehrli et al., 2019)
	Random screening of 200 compound synthesized in the laboratory		(2Z)-3-Oxo-2-(2-phenylhydrazinylidene)butanoic acid	Compound 5a	206.069	80	16.49*	Dabcyl-QALPETGEE-Edans	S. aureus SrtAΔN59-6His	Not clearly indicated	No	>55.64*	>270.00	Not specified	(Maggio et al., 2016)
	Library consisting of 2,400 clinical drugs and candidates	lead	Tideglusib	TD	334.078	0.6 ± 0.2	0.20 ± 0.07*	Abz-LPATG-Dnp	S. aureus SrtAΔN24	Reversible	Yes (Yang et al., 2020)	>100.0	>299.33*	S. aureus strain Newman	(Yang et al., 2020)
	Chemical library comprising of 8000 compounds		3-[3-(Tetrahydro-3-thiophenylamino)-1-piperidinyl]-2(1H)-pyrazinone	Z1758047752 or N12	280.389	172.30 ± 20.01	48.31 ± 5.61*	Dabcyl-LPETG-Edans	Staphylococcus epidermidis SrtAΔN70	Not tested	No	Not tested	Not tested	Not tested	(This study)
						28.09 ± 8.45	7.88 ± 2.37*	Abz-LPETG-K(Dnp)
						158.3 ± 11.1	44.39 ± 3.11*	Dabcyl-LPETG-Edans	Streptococcus pneumoniae SrtAΔN59
						70.06 ± 8.87	19.64 ± 2.49*	Abz-LPETG-K(Dnp)
	Traditional Chinese medicine (TCM) herb-derived natural compound screening		Erianin	-	318.147	65.7 ± 7.2	20.91 ± 2.31	Dabcyl-QALPETGEE-Edans	srtAΔN59 from S. aureus NewmanD2C	Reversible? ("stable bond via hydrophobic interactions")	Yes (Ouyang et al., 2018)	512	1609.32*	S. aureus strain ATCC25904 (Newman D2C)	(Ouyang et al., 2018)
In silico screening	Virtual screening of oligopeptides		Leu-Pro-Arg-Asp-Ala (oligopeptide)	LPRDA	571	10.61	6.06*	Dabcyl-QALPTTGEE-Edans	S. aureus SrtAΔN59	Reversible? ("It was clear that the oligopeptide bound to SrtA via hydrogen bonding and hydrophobic interactions")	Yes (Wang et al., 2018)	>114.20*	>200.00	S. aureus (MRSA) USA 300	(Wang et al., 2018)
	Virtual screening of commercial small-molecule libraries from Maybridge and ChemBridge (150,000 compounds)	lead	related to 2-(4-Morpholinyl)-5-{[(2E)-3-(2-thienyl)-2-propenoyl]amino}benzoic acid	Compound 1	358.41	75.00 ± 4.10	26.88 ± 1.47*	Dabcyl-QALPTTGEE-Edans	S. aureus SrtAΔN59	Reversible	No	Not tested	Not tested	Not tested	(Chenna et al., 2008)
		further synthesis	related to methyl 5-{[(2E)-3-(furan-2-yl)prop-2-enoyl]amino}-2-(morpholin-4-yl)benzoate	Compound 12b	356.4	58.00 ± 4.90	20.67 ± 1.75*	Dabcyl-QALPTTGEE-Edans	S. aureus SrtAΔN59	Not clearly indicated	No
	Virtual screening of an A*STAR Natural Organism Library (NOL)		Skyrin	Compound N1287	538.09	24.00 ± 2.10	12.91 ± 1.13*	Dabcyl-LPETG-Edans	recombinant S. aureus SrtA	Not clearly indicated?	No	3.87 ± 0.05*	7.20 ± 0.10	S. aureus ATCC 25923**	(Thappeta et al., 2020)
						31.00 ± 0.30	16.68 ± 0.16*	5-FAM/QXL	recombinant S. aureus SrtA
	Virtual screening of ~33,000 compounds from the ZINC database		(2-(2,3-dihydro-1h-perimidin-2-yl)-phenoxy)-acetic acid	Compound 1	320.35	47.2 ± 5.9	15.12 ± 1.89 *	Abz‐LPETG‐Dap(Dnp)-NH2	S. aureus SrtAΔN59	Reversible?	No	Not tested	Not tested	Not tested	(Chan et al., 2013)
	Further synthesis of derivatives of a previously in silico identified lead		Methyl 5-((E)-3-(furan-2-yl)acrylamido)-2- morpholinobenzoate	Compound 5b	356.372	58 ± 4.9	20.67 ± 1.75*	Dabcyl-QALPETGEE-Edans	S. aureus SrtAΔN59	Not clearly indicated	No	Not tested	Not tested	Not tested	(Chenna et al., 2010)
	Virtual screening of the drug-like Specs database which contains about 300,000 compounds	synthetic optimization	3-(4-pyridinyl)-6-(2-sodiumsulfonatephenyl)[1,2,4]triazolo[3,4-b][1,3,4]thiadiazole	Compound 6e	358.007	9.3 ± 0.7	3.33 ± 0.25*	Abz-LPATG-Dnp	S. aureus SrtAΔN24**	Reversible	Yes (Zhang et al., 2014)	>15000	>40000	S. aureus Newman	(Zhang et al., 2014)
"*" indicates that mass concentration was derived from molar concentration or that molar concentration was derived from mass concentration
"**" indicates that MIC values against other species/strains or effects on more than one SrtA were tested within the refenced study

## Sheet: TableReferences
#	References
1	Bae, J., Jeon, J. E., Lee, Y. J., Lee, H. S., Sim, C. J., Oh, K. B., et al. (2011). Sesterterpenes from the tropical sponge Coscinoderma sp. J. Nat. Prod. 74, 1805–1811. doi:10.1021/np200492k.
2	Chan, A. H., Wereszczynski, J., Amer, B. R., Yi, S. W., Jung, M. E., Mccammon, J. A., et al. (2013). Discovery of staphylococcus aureus sortase a inhibitors using virtual screening and the relaxed complex scheme. Chem. Biol. Drug Des. 82, 418–428. doi:10.1111/cbdd.12167.
3	Chenna, B. C., King, J. R., Shinkre, B. A., Glover, A. L., Lucius, A. L., and Velu, S. E. (2010). Synthesis and structure activity relationship studies of novel Staphylococcus aureus Sortase A inhibitors. Eur. J. Med. Chem. 45, 3752–3761. doi:10.1016/j.ejmech.2010.05.024.
4	Chenna, B. C., Shinkre, B. A., King, J. R., Lucius, A. L., Narayana, S. V. L., and Velu, S. E. (2008). Identification of novel inhibitors of bacterial surface enzyme Staphylococcus aureus Sortase A. Bioorganic Med. Chem. Lett. 18, 380–385. doi:10.1016/j.bmcl.2007.10.051.
5	Dong, J., Zhang, L., Xu, N., Zhou, S., Song, Y., Yang, Q., et al. (2021). Rutin reduces the pathogenicity of Streptococcus agalactiae to tilapia by inhibiting the activity of sortase A. Aquaculture 530, 735743. doi:10.1016/j.aquaculture.2020.735743.
6	Jang, K. H., Chung, S. C., Shin, J., Lee, S. H., Kim, T. I., Lee, H. S., et al. (2007). Aaptamines as sortase A inhibitors from the tropical sponge Aaptos aaptos. Bioorganic Med. Chem. Lett. 17, 5366–5369. doi:10.1016/j.bmcl.2007.08.007.
7	Jeon, J. E., Na, Z., Jung, M., Lee, H. S., Sim, C. J., Nahm, K., et al. (2010). Discorhabdins from the Korean Marine Sponge Sceptrella sp. J. Nat. Prod. 73, 258–262. doi:10.1021/np9005629.
8	Kang, S. S., Kim, J. G., Lee, T. H., and Oh, K. B. (2006). Flavonols inhibit sortases and sortase-mediated Staphylococcus aureus clumping to fibrinogen. Biol. Pharm. Bull. 29, 1751–1755. doi:10.1248/bpb.29.1751.
9	Kim, S. H., Shin, D. S., Oh, M. N., Chung, S. C., Lee, J. S., Chang, I. M., et al. (2003). Inhibition of sortase, a bacterial surface protein anchoring transpeptidase, by β-sitosterol-3-O-glucopyranoside from Fritillaria verticillata. Biosci. Biotechnol. Biochem. 67, 2477–2479. doi:10.1271/bbb.67.2477.
10	Kim, S. H., Shin, D. S., Oh, M. N., Chung, S. C., Lee, J. S., and Oh, K. B. (2004). Inhibition of the bacterial surface protein anchoring transpeptidase sortase by isoquinoline alkaloids. Biosci. Biotechnol. Biochem. 68, 421–424. doi:10.1271/bbb.68.421.
11	Lee, S., Song, I. H., Lee, J. H., Yang, W. Y., Oh, K. B., and Shin, J. (2014). Sortase A inhibitory metabolites from the roots of Pulsatilla koreana. Bioorganic Med. Chem. Lett. 24, 44–48. doi:10.1016/j.bmcl.2013.12.006.
12	Lee, Y. J., Han, Y. R., Park, W., Nam, S. H., Oh, K. B., and Lee, H. S. (2010). Synthetic analogs of indole-containing natural products as inhibitors of sortase A and isocitrate lyase. Bioorganic Med. Chem. Lett. 20, 6882–6885. doi:10.1016/j.bmcl.2010.10.029.
13	Maggio, B., Raffa, D., Raimondi, M. V., Cascioferro, S., Plescia, F., Schillaci, D., et al. (2016). Discovery of a new class of sortase a transpeptidase inhibitors to tackle gram-positive pathogens: 2-(2-phenylhydrazinylidene)alkanoic acids and related derivatives. Molecules 21. doi:10.3390/molecules21020241.
14	Maresso, A. W., Wu, R., Kern, J. W., Zhang, R., Janik, D., Missiakas, D. M., et al. (2007). Activation of inhibitors by sortase triggers irreversible modification of the active site. J. Biol. Chem. 282, 23129–23139. doi:10.1074/jbc.M701857200.
15	Oh, I., Yang, W. Y., Chung, S. C., Kim, T. Y., Oh, K. B., and Shin, J. (2011). In vitro sortase A inhibitory and antimicrobial activity of flavonoids isolated from the roots of Sophora flavescens. Arch. Pharm. Res. 34, 217–222. doi:10.1007/s12272-011-0206-0.
16	Oh, K. B., Kim, S. H., Lee, J., Cho, W. J., Lee, T., and Kim, S. (2004). Discovery of Diarylacrylonitriles as a Novel Series of Small Molecule Sortase A Inhibitors. J. Med. Chem. 47, 2418–2421. doi:10.1021/jm0498708.
17	Oh, K. B., Mar, W., Kim, S., Kim, J. Y., Oh, M. N., Kim, J. G., et al. (2005). Bis(indole) alkaloids as sortase A inhibitors from the sponge Spongosorites sp. Bioorganic Med. Chem. Lett. 15, 4927–4931. doi:10.1016/j.bmcl.2005.08.021.
18	Oh, K. B., Nam, K. W., Ahn, H., Shin, J., Kim, S., and Mar, W. (2010). Therapeutic effect of (Z)-3-(2,5-dimethoxyphenyl)-2-(4-methoxyphenyl) acrylonitrile (DMMA) against Staphylococcus aureus infection in a murine model. Biochem. Biophys. Res. Commun. 396, 440–444. doi:10.1016/j.bbrc.2010.04.113.
19	Oh, K. B., Oh, M. N., Kim, J. G., Shin, D. S., and Shin, J. (2006). Inhibition of sortase-mediated Staphylococcus aureus adhesion to fibronectin via fibronectin-binding protein by sortase inhibitors. Appl. Microbiol. Biotechnol. 70, 102–106. doi:10.1007/s00253-005-0040-8.
20	Ouyang, P., He, X., Yuan, Z. W., Yin, Z. Q., Fu, H., Lin, J., et al. (2018). Erianin against staphylococcus aureus infection via inhibiting sortase A. Toxins (Basel). 10, 1–14. doi:10.3390/toxins10100385.
21	Park, B. S., Kim, J. G., Kim, M. R., Lee, S. E., Takeoka, G. R., Oh, K. B., et al. (2005). Curcuma longa L. constituents inhibit sortase A and Staphylococcus aureus cell adhesion to fibronectin. J. Agric. Food Chem. 53, 9005–9009. doi:10.1021/jf051765z.
22	Suree, N., Yi, S. W., Thieu, W., Marohn, M., Damoiseaux, R., Chan, A., et al. (2009). Discovery and structure-activity relationship analysis of Staphylococcus aureus sortase A inhibitors. Bioorganic Med. Chem. 17, 7174–7185. doi:10.1016/j.bmc.2009.08.067.
23	Thappeta, K. R. V., Zhao, L. N., Nge, C. E., Crasta, S., Leong, C. Y., Ng, V., et al. (2020). In-silico identified new natural sortase a inhibitors disrupt s. Aureus biofilm formation. Int. J. Mol. Sci. 21, 1–18. doi:10.3390/ijms21228601.
24	Wang, L., Bi, C., Cai, H., Liu, B., Zhong, X., et al. (2015). The therapeutic effect of chlorogenic acid against Staphylococcus aureus infection through sortase A inhibition. Front. Microbiol. 6, 1031. https://doi.org/10.3389/fmicb.2015.01031
25	Wang, J., Li, H., Pan, J., Dong, J., Zhou, X., Niu, X., et al. (2018). Oligopeptide targeting sortase a as potential anti-infective therapy for Staphylococcus aureus. Front. Microbiol. 9, 1–10. doi:10.3389/fmicb.2018.00245.
26	Wang, J., Shi, Y., Jing, S., Dong, H., Wang, D., and Wang, T. (2019). Astilbin Inhibits the Activity of Sortase A from Streptococcus mutans. Molecules 24, 1–11. doi:10.3390/molecules24030465.
27	Wehrli, P. M., Uzelac, I., Olsson, T., Jacso, T., Tietze, D., and Gottfries, J. (2019). Discovery and development of substituted thiadiazoles as inhibitors of Staphylococcus aureus Sortase A. Bioorganic Med. Chem. 27, 115043. doi:10.1016/j.bmc.2019.115043.
28	Won, T. H., Jeon, J. E., Kim, S. H., Lee, S. H., Rho, B. J., Oh, D. C., et al. (2012a). Brominated aromatic furanones and related esters from the ascidian synoicum sp. J. Nat. Prod. 75, 2055–2061. doi:10.1021/np3005562.
29	Won, T. H., Jeon, J. E., Lee, S. H., Rho, B. J., Oh, K. B., and Shin, J. (2012b). Beta-carboline alkaloids derived from the ascidian Synoicum sp. Bioorganic Med. Chem. 20, 4082–4087. doi:10.1016/j.bmc.2012.05.002.
30	Yang, T., Zhang, T., Guan, X. N., Dong, Z., Lan, L., Yang, S., et al. (2020). Tideglusib and Its Analogues As Inhibitors of Staphylococcus aureus SrtA. J. Med. Chem. 63, 8442–8457. doi:10.1021/acs.jmedchem.0c00803.
31	Yang, W. Y., Won, T. H., Ahn, C. H., Lee, S. H., Yang, H. C., Shin, J., et al. (2015). Streptococcus mutans sortase A inhibitory metabolites from the flowers of Sophora japonica. Bioorganic Med. Chem. Lett. 25, 1394–1397. doi:10.1016/j.bmcl.2015.02.051.
32	Zhang, J., Liu, H., Zhu, K., Gong, S., Dramsi, S., Wang, Y. T., et al. (2014). Antiinfective therapy with a small molecule inhibitor of Staphylococcus aureus sortase. Proc. Natl. Acad. Sci. U. S. A. 111, 13517–13522. doi:10.1073/pnas.1408601111.
33	Zhulenkovs, D., Rudevica, Z., Jaudzems, K., Turks, M., and Leonchiks, A. (2014). Discovery and structure-activity relationship studies of irreversible benzisothiazolinone-based inhibitors against Staphylococcus aureus sortase A transpeptidase. Bioorganic Med. Chem. 22, 5988–6003. doi:10.1016/j.bmc.2014.09.011.
